# Supplementary material
Source: PubMed Central journal article supplement (PMC6126905)
Supplement: NIHMS927201-supplement-1.pdf [file NIHMS927201-supplement-1.pdf]

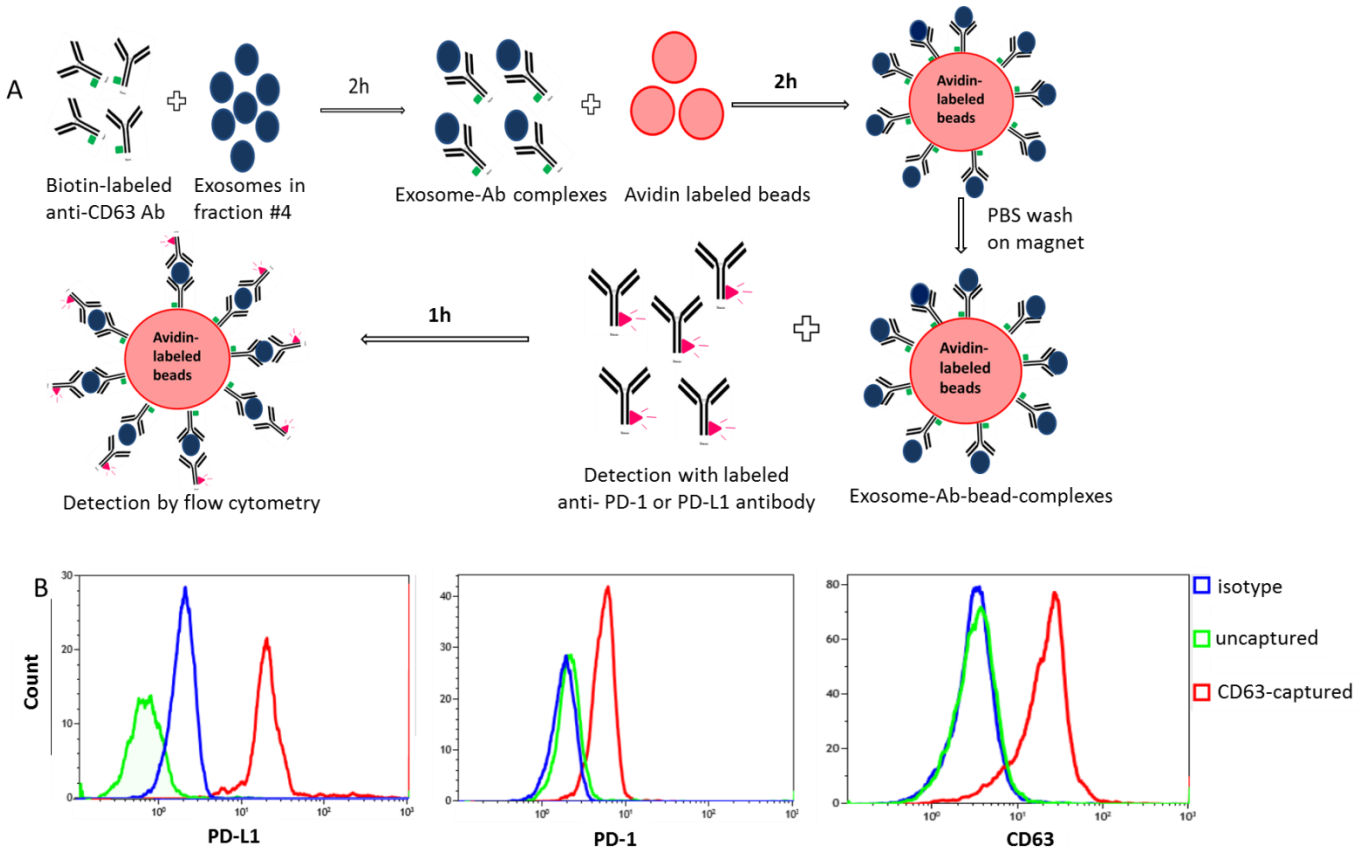

**Supplementary Figure 1:** **A.** diagrammatic presentation of exosome capture with biotinylated anti-CD63 mAb and magnetic streptavidin-labeled beads. This step is required for loading exosomes on beads for flow cytometry. Once loaded, exosomes are stained with a labeled detection mAb specific for an antigen carried on the exosome surface. **B.** Representative flow cytometry profiles comparing RFVs of PD-L1, PD-1 and CD63 carried by exosomes captured on beads with anti-CD63 Ab (*red*) vs. RFVs of non-captured exosomes, which were re-captured with anti-CD63 Ab for antigen detection by flow. Note that re-captured exosomes (*green*) are negative for PD-L1, PD-1 and CD63.
