# Supplementary material
Source: PubMed Central journal article supplement (PMC6126905)
Supplement: NIHMS927201-supplement-2.pdf [file NIHMS927201-supplement-2.pdf]

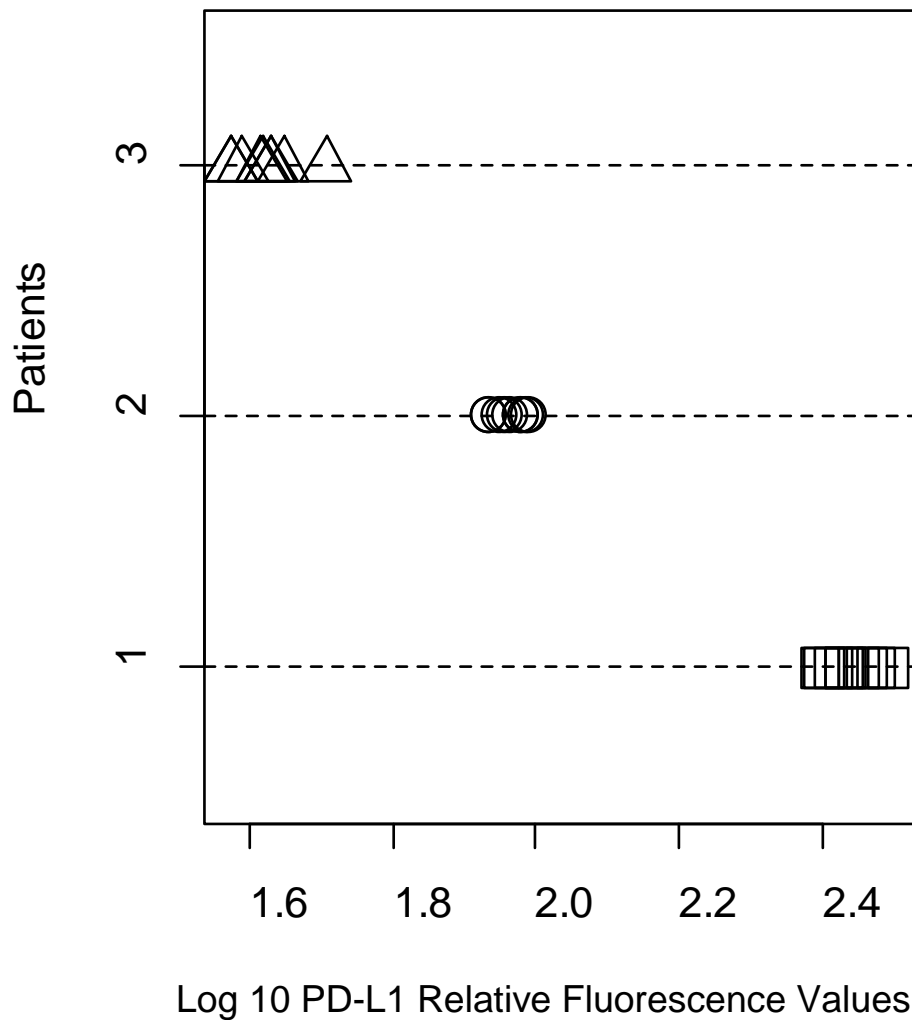

**Supplementary Figure 2:** Reproducibility of the flow cytometry-based detection for surface PD-L1 present on exosomes. Exosomes of 3 patients were captured on beads and stained for PD-L1. Each sample was divided into three equal parts (denoted as black circles, open squares and triangles). These aliquots were again divided into three equal parts. The process allowed for staining of 9 samples for each patient and for computation of intra- and inter-individual variability. Minimal intra- individual variability (7%) is evident. Inter-individual variability was 93%.
