# Supplementary material
Source: PubMed Central journal article supplement (PMC6126905)
Supplement: NIHMS927201-supplement-3.pdf [file NIHMS927201-supplement-3.pdf]

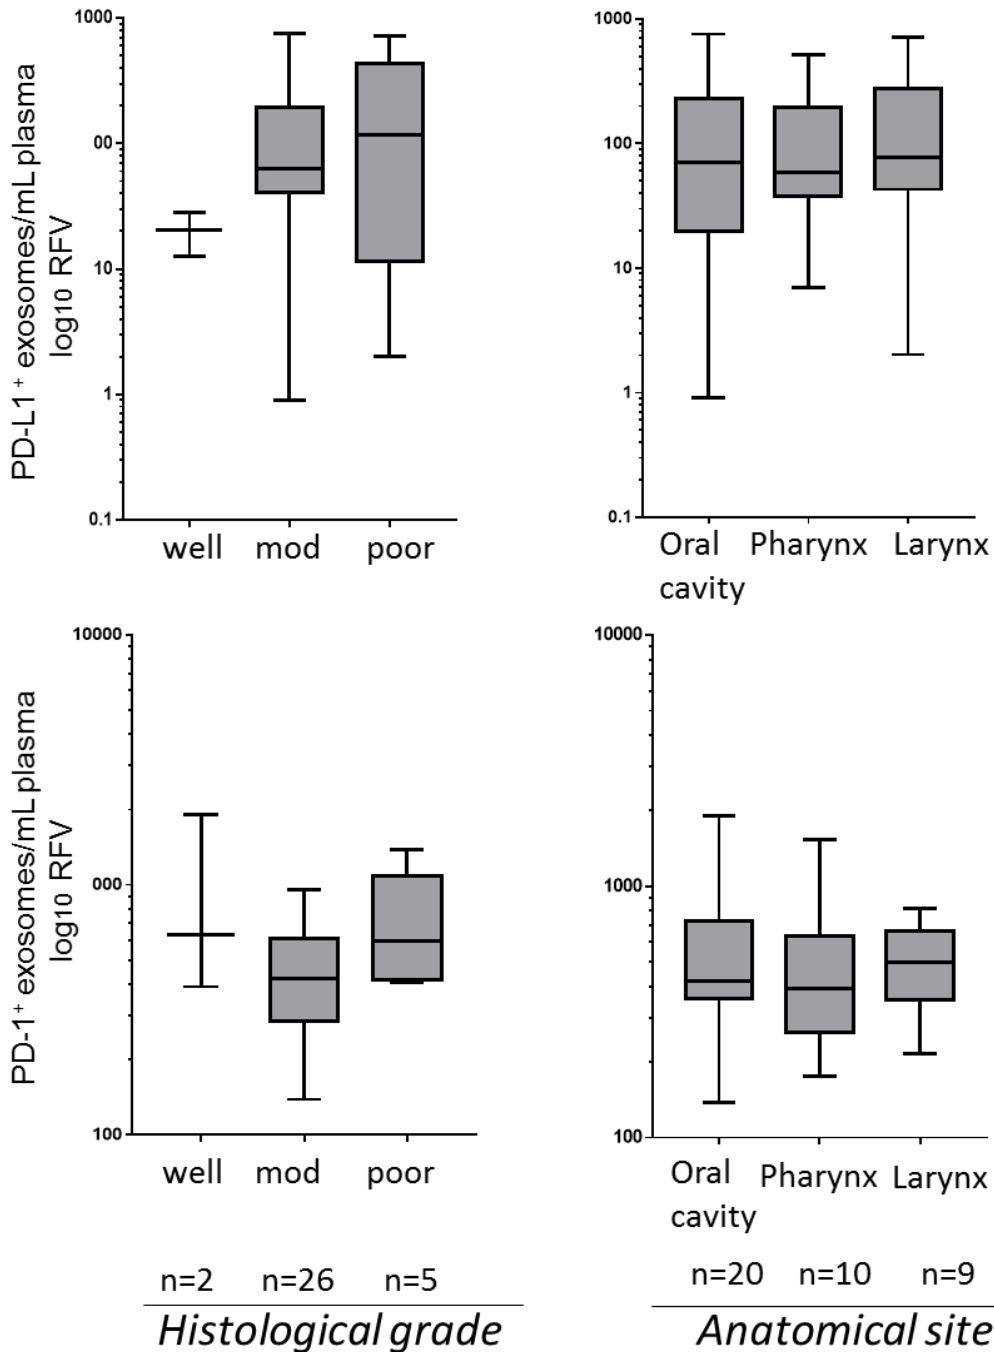

**Supplementary Figure 3:** The RFVs for PD-L1<sup>+</sup> or PD-1<sup>+</sup> exosomes in plasma of HNSCC patients does not correlate with the tumor differentiation (well, moderate, poor) determined at the time of diagnosis or with the anatomical site of cancer (oral cavity, pharynx, larynx). In some patients with poorly differentiated tumors, PD-L1<sup>+</sup> exosome RFVs/mL plasma were increased.
