# Supplementary material
Source: PubMed Central journal article supplement (PMC6126905)
Supplement: NIHMS927201-supplement-4.pdf [file NIHMS927201-supplement-4.pdf]

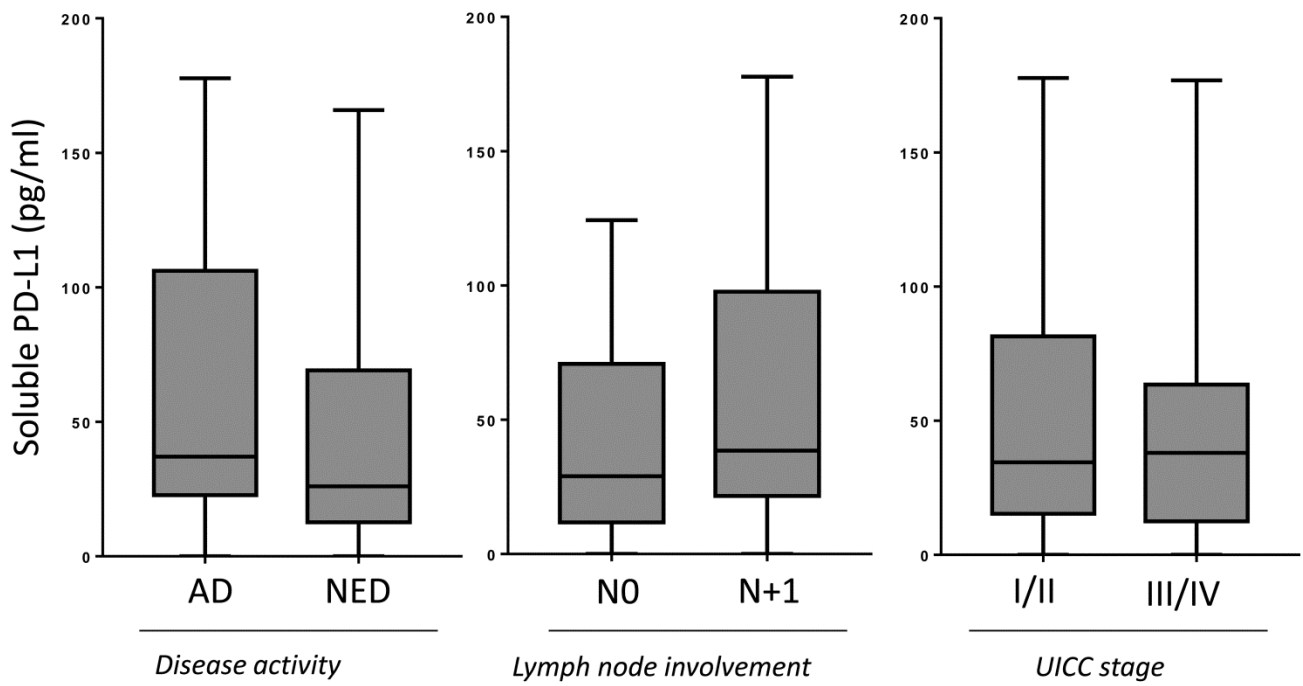

**Supplementary Figure 4:** No correlations were detected ( $p > 0.05$ ) between soluble PD-L1 levels and clinicopathological profiles of HNSCC patients.
