# Supplementary material
Source: PubMed Central journal article supplement (PMC6126905)
Supplement: NIHMS927201-supplement-5.pdf [file NIHMS927201-supplement-5.pdf]

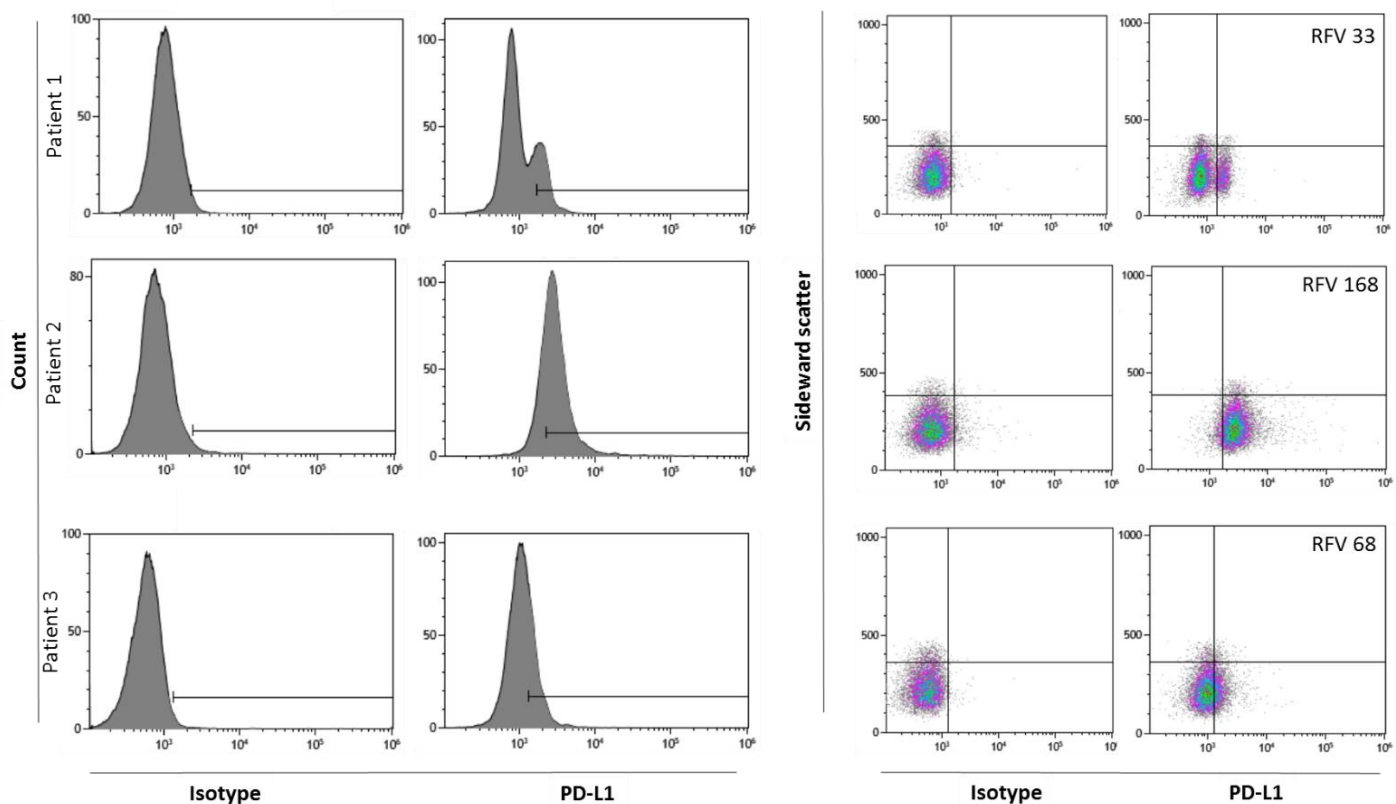

**Supplementary Figure 5:** Gating for three representative patients (Figure 1D) showing the histograms and the density plots. The gates were set at the point where only ~2% of the isotype control was positive (at approximately 2 SD from the mean of isotype control).
