# Supplementary material
Source: PubMed Central journal article supplement (PMC6126905)
Supplement: NIHMS927201-supplement-6.pdf [file NIHMS927201-supplement-6.pdf]

**SupplementaryTable 1:** Percent of CD63<sup>+</sup> beads loaded with exosomes in the CD63<sup>+</sup> captured and CD63<sup>-</sup> uncaptured fractions

Percent CD63 positive exosomes on beads

| <b>Patient</b> | <b>CD63+ fraction</b> | <b>CD63 (-) uncaptured fraction</b> |
|----------------|-----------------------|-------------------------------------|
| 1              | 90                    | 2                                   |
| 2              | 89                    | 8                                   |
| 3              | 94                    | 2                                   |
