# Supplementary material
Source: PubMed Central journal article supplement (PMC6126905)
Supplement: NIHMS927201-supplement-7.pdf [file NIHMS927201-supplement-7.pdf]

**Supplementary Table 2:** Treatment regimens of patients with no evident disease

| Table II. Treatment regimens of NED patients |                     |     |
|----------------------------------------------|---------------------|-----|
|                                              | NED Patients (n=17) |     |
|                                              | n                   | %   |
| <i>Number of treatments</i>                  |                     |     |
| 1                                            | 9                   | 53% |
| 2                                            | 8                   | 47% |
| <i>Treatment regimens</i>                    |                     |     |
| surgery                                      | 7                   | 41% |
| primary chemoradiotherapy                    | 2                   | 12% |
| surgery, adj. radiotherapy                   | 2                   | 12% |
| surgery, adj. chemotherapy                   | 1                   | 6%  |
| surgery, adj. chemoradiotherapy              | 5                   | 29% |
